# Supplementary material for: Mining of favorable alleles for seed reserve utilization efficiency in Oryza sativa by means of association mapping
Source: BMC Genet. 2020 Jan 16;21:4. doi: 10.1186/s12863-020-0811-3 (PMC6966888; doi:10.1186/s12863-020-0811-3)
Supplement: Supplementary file 7 — Additional file 7. Table S3. Analysis of molecular variance (AMOVA) for six subpopulations of rice accessions. [file 12863_2020_811_MOESM7_ESM.xlsx]

## Sheet: Sheet1
	Supplementary table 3: Analysis of molecular vaiance (AMOVA) for six subpopulations of rcie accessions
	Source of variation	df	Sum of squares	Variance components	Percentage of variation	P Value
	Among populations	5	16137.2	37.541	35.58	<0.01
	Among individuals within population	500	33978.8	67.957	64.42	<0.01
	Total	505	50116	105.499
