# Supplementary material for: Mining of favorable alleles for seed reserve utilization efficiency in Oryza sativa by means of association mapping
Source: BMC Genet. 2020 Jan 16;21:4. doi: 10.1186/s12863-020-0811-3 (PMC6966888; doi:10.1186/s12863-020-0811-3)
Supplement: Supplementary file 8 — Additional file 8. Table S4. Comparisons of marker loci detected in this study with loci reported previously. [file 12863_2020_811_MOESM8_ESM.xlsx]

## Sheet: Sheet1
Supplementary table 4 Comparisons of marker loci detected in this study with loci reported previously
No#	Marker	Chr.	Physical distance/bp	Trait	QTLs/SSR	Physical distance/bp	Mapping population	Ref.
1	RM128	1	30737705-30737861	RTL	qRTL1.1	22077133-24187913	(BILs: BC1F7) (Nipponbare/Kasalath//Nipponbare)	Manangkil, et al .,2013
				RTL	qRTL1.2	15617197-22077613
				SFW	qSFW1.1	15617197-22077613
				GI	qGI-1	23971321-23325199	RIL (IR28/Daguandao)	Wang et al .,2010
				GR	qGR-1	15118625-23325199
				SH	qFV-1-2	27625475-29184845	RILs(Lemont/Teqing)	Zhou et al .,2007
				RN	qrn2-1	17040590-17041159
				qSRUE1	RM5536–RM3362	41166774- 43043114	RILs(Jiucaiqing/IR26)	Cheng et al.,2013
2	RM297	1	32099566-32099760	SL	RM297	32099566-32099760	BC3F3(Vandana/Moroberekan)	Cairns et al.,2009
3	RM525	2	28292005-28292040	SDW	RM5631	28292005-28292040	F2-F3 (Milyang23/Jileng1)	Han et al.,2007
				qSDW2	RM263-RM6	25865402-29579988
4	RM232	3	15644275-15646800	GR	qGR3-1	285247366-28724834	RILs( Zhenshan97/Minghui63)	Cui et al .,2002
				SW	qSW3-1	27127661-28528927
				SW	qSW3-2	23088332-23088721
				SHL	qSHL3.1	1288931-14291501	(BILs: BC1F7) (Nipponbare/Kasalath//Nipponbare)	Manangkil et al .,2013
				SHL	qSHL3.2	718777-3964998
				RTL	qRTL3.1	6755021-8410886	DH(CT9993/IR62266)	Kanbar et al ., 2006
5	RM3471	4	6310055-6310203	SL	RM185	18579760-18579957	BC3F3(Vandana/Moroberekan)	Cairns et al.,2009
				SRUE	qSRUE4.1	688353-2030305	RILs(Jiucaiqing/IR26)	Cheng et al.,2013
				SRUE	qSRUE4.2	2030135-8067386
				SFW	qSFW4.3	4438537-8235667	(BILs: BC1F7) (Nipponbare/Kasalath//Nipponbare)	Manangkil et al .,2013
				SFW	qSFW4.4	4438537-12581124
				GP	qGP-4	21242569-29061127	RIL (IR28/Daguandao)	Wang et al .,2010
6	RM5818	5	29686862-29687034	qmrl5-1	RG313	27342022-28706633	DH(CT9993/IR62266)	Kanbar et al ., 2006
				DW	N10150-Y1049	5255880-5256140	RILs (Lemont/Teqing)	Zheng et al ., 2004
				QSV-5
				qFV-5-1	RM13–N10150–Y1049	5255880-5256140	RILs(Lemont/Teqing)	Zhou et al .,2007
7	RM7309	6	26297238-26297595	SFW	qSFW6.1	23348366-24916831	(BILs: BC1F7) (Nipponbare/Kasalath//Nipponbare)	Manangkil et al .,2013
				GR	qGR6-1	6927624-6928661	RILs( Zhenshan97/Minghui63)	Cui et al .,2002
				GR	qGR6-2	1764623-32460541
				TDW	qTDW6-1	24916395-28640569
				SDW	qSDW6-1	24916395-28640569
8	RM3138	6	28469081-28469279	GP	qGP-6	26554756-28599319	RIL (IR28/Daguandao)	Wang et al .,2010
				DRW	qDSW6.2	28599181-30971169	RILs(Jiucaiqing/RI26)	Wang et al.2012
				RL	RM30-RM340	28130152-28599297	RILs (Lemont/Teqing)	Zhang et al ., 2004
9	RM3589	7	25107067-25107271	qGI-7	RM427-RM1353	2678661-3312054	RIL (IR28/Daguandao)	Wang et al .,2010
				SRUE	qSRUE7.4	8910448	RILs(Jiucaiqing/IR26)	Cheng,et al., 2013
10	RM281	8	27895505-27895639	qSDW8	RM284-RM80	21142384-24278817	F2-F3 (Milyang23/Jileng1)	Han et al.,2007
				qGP-8	RM22491-RM22694	8969179-4504984	RIL (IR28/Daguandao)	Wang et al .,2010
				qSV-8-1	RM223-RM210	20650060-22472030	RILs (Lemont/Teqing)	Zhang et al ., 2004
11	RM434	9	15662573-15662838	qSDW9-1	C734-R1164	1611221-6016329	RILs( Zhenshan97/Minghui63)	Cui et al .,2002
				qSDW9	RM6570–RM3164	16461290	RILs(Jiucaiqing/IR26)	Cheng et al.,2013
12	RM184	10	16358895-16359111	qSHL3.1	R2170–C1135	1288931-14291501	(BILs: BC1F7) (Nipponbare/Kasalath//Nipponbare)	Manangkil et al .,2013
				qSFW3.1	C136–R250	25115568-26729079
				qpht3-1	RZ313	28213692-28813128	DH(CT9993/IR62266)	Kanbar et al ., 2006
				qpht3-2	RG369	28213692-28813128
				qFV-3-1	RG341b–RM218	8405368-8405516	RILs(Lemont/Teqing)	Zhou et al .,2007
				qFV-3-2	OSR31–RM168	27411671-28091727
				qSV-3-1	RM16-OSR31-RM168	23126064-28091727	RILs (Lemont/Teqing)	Zhang et al ., 2004
				GR/SL	RM148-RM85	27411671-35836096
13	RM5746	12	5091914-5092089	qSRUE12.1	RM20–RM6296	2230074	RILs(Jiucaiqing/IR26)	Cheng et al.,2013
				qSRUE12.2	RM5609–RM6953	2162067
				qWMSR12	RM519–RM7376	3537530
Note: marker loci with bold font are newly detected in this study.
